# Supplementary material
Source: HighWire-hosted journal article supplement (https://mbio.asm.org/content/10/1/e02816-18)
Supplement: inline-supplementary-material-4 [file inline-supplementary-material-4.pdf]

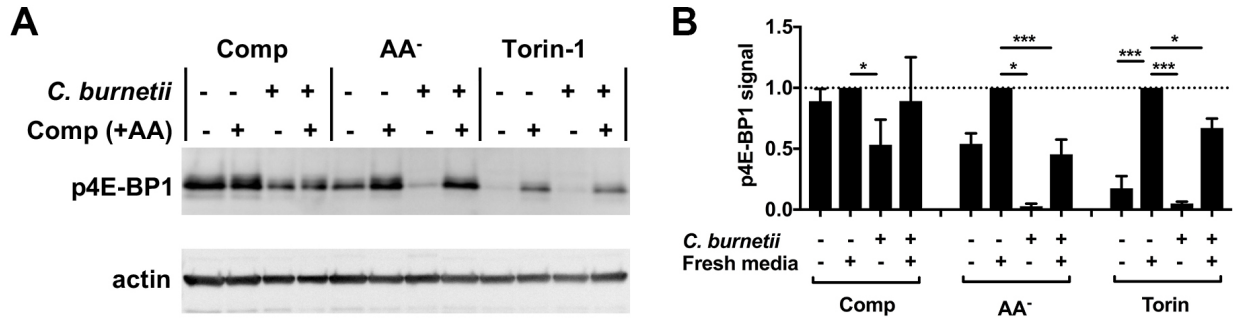

**Supplemental Figure 4. Addition of extra amino acids does not rescue reduced phosphorylation of 4E-BP1 in *C. burnetii* infected THP-1 cells.** (A) Immunoblot of lysates from infected or uninfected THP-1 macrophages incubated for 72 h in complete (Comp), AA<sup>-</sup>, or Torin-1 medium, with or without additional incubation for 30 min in Comp medium plus additional essential and nonessential amino acids (+AA). Blots were probed and immunoblotted with antibodies against phosphorylated 4E-BP1 Thr37/46 (p4E-BP1) or actin. (B) Quantitation of p4E-BP1 signal in panel 'A'. The plot depicts the mean  $\pm$  standard deviation of p4E-BP1 signal normalized to the actin loading control relative to respective control cells in complete medium for three independent experiments. Asterisks indicate statistical significance (\*  $P < 0.05$ , \*\*\*  $P < 0.001$ ).
